1 **Title:** Sperm membrane proteins DCST1 and DCST2 are required for the sperm-egg  
2 fusion process in mice and fish

3 **Authors:** Taichi Noda<sup>1,2</sup>, Andreas Blaha<sup>3,4</sup>, Yoshitaka Fujihara<sup>1,5</sup>, Krista R. Gert<sup>3,4</sup>,  
4 Chihiro Emori<sup>1</sup>, Victoria E. Deneke<sup>3</sup>, Seiya Oura<sup>1,6</sup>, Sara Berent<sup>3</sup>, Mayo Kodani<sup>1,6</sup>,  
5 Karin Panser<sup>3</sup>, Luis Enrique Cabrera-Quio<sup>3,4</sup>, Andrea Pauli<sup>3,\*</sup>, Masahito Ikawa<sup>1,6,7,\*</sup>

6 **Affiliation:**

7 <sup>1</sup>Research Institute for Microbial Diseases, Osaka University, 3-1 Yamadaoka, Suita,  
8 Osaka 565-0871, Japan

9 <sup>2</sup>Institute of Resource Development and Analysis, Kumamoto University, 2-2-1 Honjo,  
10 Kumamoto 860-0811, Japan

11 <sup>3</sup>Research Institute of Molecular Pathology (IMP), Vienna BioCenter (VBC), Campus-  
12 Vienna-Biocenter 1, 1030 Vienna, Austria

13 <sup>4</sup>Vienna BioCenter PhD Program, Doctoral School of the University at Vienna and  
14 Medical University of Vienna, Vienna, Austria

15 <sup>5</sup>Department of Bioscience and Genetics, National Cerebral and Cardiovascular Center,  
16 Suita, Osaka 564-8565, Japan

17 <sup>6</sup>Graduate School of Pharmaceutical Sciences, Osaka University, 1-6 Yamadaoka, Suita,  
18 Osaka 565-0871, Japan

19 <sup>7</sup>The Institute of Medical Science, The University of Tokyo, 4-6-1 Shirokanedai,  
20 Minato-ku, Tokyo 108-8639, Japan

21 \*Correspondences and requests for materials should be addressed to A.P. (email:  
22 [andrea.pauli@imp.ac.at](mailto:andrea.pauli@imp.ac.at)) and M.I. (email: [ikawa@biken.osaka-u.ac.jp](mailto:ikawa@biken.osaka-u.ac.jp)).

23  
24  
25 **Abstract**

26 The process of sperm-egg fusion is critical for successful fertilization, yet the  
27 underpinning mechanisms that regulate these steps have remained unclear in vertebrates.  
28 Here, we show that both mouse and zebrafish DCST1 and DCST2 are necessary in  
29 sperm to fertilize the egg, similar to their orthologs SPE-42 and SPE-49 in *C. elegans*  
30 and Sneaky in *D. melanogaster*. Mouse *Dcst1* and *Dcst2* single knockout (KO)  
31 spermatozoa are able to undergo the acrosome reaction and show normal relocalization  
32 of IZUMO1, an essential factor for sperm-egg fusion, to the equatorial segment. While  
33 both single KO spermatozoa can bind to the oolemma, they rarely fuse with oocytes,  
34 resulting in male sterility. Similar to mice, zebrafish *dcst1* KO males are subfertile and  
35 *dcst2* and *dcst1/2* double KO males are sterile. Zebrafish *dcst1/2* KO spermatozoa are  
36 motile and can approach the egg, but rarely bind to the oolemma. These data  
37 demonstrate that DCST1/2 are essential for male fertility in two vertebrate species  
38 highlighting their crucial role as conserved factors in fertilization.

39 **Main text**

40 **Introduction**

41 Until recently, only a few factors had been shown to be essential for the sperm-egg  
42 fusion process: IZUMO1 on the sperm membrane and its receptor (IZUMO1R, also  
43 known as JUNO and FOLR4) on the egg membrane (oolemma)<sup>1,2</sup>. Mammalian  
44 IZUMO1 and JUNO form a 1:1 complex, which is necessary for sperm-egg adhesion  
45 prior to fusion<sup>1,3,4</sup>. Furthermore, egg-expressed CD9 is also required for sperm-egg  
46 fusion, yet its role appears to be indirect by regulating microvilli formation on the  
47 oolemma rather than fusion<sup>5-8</sup>. Recently, we and other research groups have found that  
48 four additional sperm factors [fertilization influencing membrane protein (FIMP),  
49 sperm-oocyte fusion required 1 (SOF1), transmembrane protein 95 (TMEM95), and  
50 sperm acrosome associated 6 (SPACA6)] are also essential for the sperm-egg fusion  
51 process and male fertility in mice<sup>9-12</sup>. However, HEK293 cells expressing all of these  
52 sperm-expressed, fusion-related factors in addition to IZUMO1 were able to bind but  
53 not fuse with zona pellucida (ZP)-free eggs, suggesting that additional fusion-related  
54 factors are necessary for the completion of sperm-egg fusion<sup>11</sup>.

55  
56 DCSTAMP and OCSTAMP proteins represent an interesting group of proteins to study  
57 in the context of cell-cell fusion, since they have been shown to play a role in osteoclast  
58 and foreign body giant cell (FBGC) fusion<sup>13-15</sup>. They belong to the class of DC-  
59 STAMP-like domain-containing proteins, and are multi-pass transmembrane proteins  
60 with an intracellular C-terminus containing a non-canonical RING finger domain<sup>13,16,17</sup>.  
61 DCSTAMP was shown to localize to the plasma membrane and endoplasmic reticulum  
62 (ER) membrane in dendritic cells and osteoclasts<sup>16-19</sup>. These cell types in *Dcstamp* KO  
63 mice show no apparent defect in differentiation into the osteoclast lineage and  
64 cytoskeletal structure, yet osteoclasts and FBGCs are unable to fuse to form terminally  
65 differentiated multinucleated cells<sup>14</sup>. Even though OCSTAMP is widely expressed in  
66 mouse tissues<sup>20</sup>, the only reported defect in *Ocstamp* KO mice is the inability to form  
67 multinucleated osteoclasts and FBGCs<sup>13,15</sup>. The fusion defect is not due to a change in  
68 the expression levels of osteoclast markers, including *Dcstamp*<sup>13,15</sup>. These results  
69 established an essential role for DC-STAMP-like domain-containing proteins in cell-  
70 cell fusion.

71  
72 DC-STAMP-like domain-containing proteins, namely the testis-enriched SNKY, SPE-  
73 42, and SPE-49, are necessary for male fertility in *Drosophila*<sup>21,22</sup> and *C. elegans*<sup>23-25</sup>,  
74 respectively. Specifically, *sneaky*-disrupted fly spermatozoa can enter the egg, but fail  
75 to break down the sperm plasma membrane: the male pronucleus thus does not form,  
76 and embryonic mitotic divisions do not occur<sup>22</sup>. *Spe-42* and *spe-49* mutant *C. elegans*  
77 spermatozoa can migrate into the spermatheca, the site of fertilization in worms, but  
78 these mutants are nearly or completely sterile, respectively, suggesting that SPE-42 and  
79 SPE-49 are involved in the ability of spermatozoa to fertilize eggs<sup>23-25</sup>. SNKY, SPE-42  
80 and SPE-49 have homologs in vertebrates called DCST1 and DCST2, but the roles of  
81 these proteins have remained undetermined. Here, we analyzed the physiological  
82 function of *Dcst1* and *Dcst2* and their effect on sperm fertility using genetically  
83 modified mice and zebrafish.

84 **Results**

85 **DCST1 and DCST2 are required for male fertility in mice.**

86 RT-PCR analysis with multiple mouse tissues showed that *Dcst1* and *Dcst2* mRNAs are  
87 abundantly expressed in mouse testis (**Figure 1A**). Using published single-cell RNA-  
88 sequencing data<sup>26</sup>, we found that *Dcst1* and *Dcst2* mRNAs peak in mid-round  
89 spermatids, indicating that the expression patterns of *Dcst1* and *Dcst2* are similar to that  
90 of the other sperm-egg fusion-related genes *Izumo1*, *Fimp*, *Sof1*, *Tmem95*, and *Spaca6*  
91 (**Figure 1B**). DCST1 and DCST2 are conserved in vertebrates from fish to humans  
92 (**Figure S1A**). Sequence homology between mouse DCST1 and mouse DCST2 was  
93 24.3% at the amino acid level using Clustal Omega (**Figure S1B**). DCST1 and DCST2  
94 have multiple (six to eight) predicted transmembrane (TM) helices (**Figure S1C**), and  
95 an atypical C<sub>4</sub>C<sub>4</sub>RING finger domain at their intracellular C-termini that is required for  
96 SPE-42 function in *C. elegans*<sup>25</sup>.

97  
98 Using CRISPR/Cas9-mediated mutagenesis, we generated *Dcst2* mutant mice lacking  
99 7,223 bp (*Dcst2*<sup>del/del</sup>), which resulted in the deletion of almost all of the *Dcst2* open  
100 reading frame (ORF) (**Figure S2A-C**). Of note, the expression level of *Dcst1* mRNA in  
101 *Dcst2*<sup>del/del</sup> testis decreased (**Figure S2D**), suggesting that the deleted region is required  
102 for *Dcst1* expression in the testis. As shown in **Figure S2A**, *Dcst1* and *Dcst2* are  
103 tandemly arranged such that parts of their 5' genomic regions overlap. To assess the  
104 role of each gene, we generated *Dcst1* indel mice (*Dcst1*<sup>d1/d1</sup>) and *Dcst2* indel mice  
105 (*Dcst2*<sup>d25/d25</sup>) (**Figure S3A and B**). RNA isolation from mutant testes followed by  
106 cDNA sequencing revealed that *Dcst1*<sup>d1/d1</sup> has a 1-bp deletion in exon 1, and *Dcst2*<sup>d25/d25</sup>  
107 has a 25-bp deletion in exon 4 (**Figure S3C and D**). Both deletions result in frameshift  
108 mutations leading to premature stop codons.

109  
110 The *Dcst1*<sup>d1/d1</sup>, *Dcst2*<sup>d25/d25</sup>, and *Dcst2*<sup>del/del</sup> male mice successfully mated with female  
111 mice, but the females rarely delivered offspring {pups/plug: 9.01 ± 2.77 [control (Ctrl),  
112 19 plugs], 0.22 ± 0.19 [*Dcst1*<sup>d1/d1</sup>, 17 plugs], 0 [*Dcst2*<sup>d25/d25</sup>, 42 plugs], 0 [*Dcst2*<sup>del/del</sup>, 24  
113 plugs]}, indicating that these males are almost sterile (**Figure 1C**). Unexpectedly, the  
114 indel mutations in *Dcst1*<sup>d1/d1</sup> and *Dcst2*<sup>d25/d25</sup> decreased the expression level of *Dcst1*  
115 mRNA in *Dcst2*<sup>d25/d25</sup> testis and *Dcst2* mRNA in *Dcst1*<sup>d1/d1</sup> testis, respectively (**Figure**  
116 **S3C**). To evaluate the influence of the decreased expression level of *Dcst1* and *Dcst2*  
117 mRNAs on male fertility, we obtained double heterozygous (*Dcst1*<sup>d1/wt</sup> and *Dcst2*<sup>del/wt</sup>)  
118 (dHZ) males through intercrossing. The dHZ males showed a decreased expression  
119 level of both *Dcst1* and *Dcst2* mRNA in the testis, but their fertility was comparable to  
120 that of the control (**Figure S3E**), indicating that the expression levels of *Dcst1* mRNA  
121 from the *Dcst2*<sup>d25</sup> allele and *Dcst2* mRNA from the *Dcst1*<sup>d1</sup> allele are decreased but still  
122 sufficient to maintain male fertility. This data reconfirms that DCST2 is indispensable  
123 for male fertility. Hereafter, we used *Dcst1*<sup>d1/d1</sup> and *Dcst2*<sup>d25/d25</sup> male mice for all  
124 experiments unless otherwise specified.

125  
126 **Spermatozoa from *Dcst1*<sup>d1/d1</sup> and *Dcst2*<sup>d25/d25</sup> mice rarely fertilize eggs.**

127 The gross morphology of *Dcst1*<sup>d1/d1</sup> and *Dcst2*<sup>d25/d25</sup> testes was comparable to the  
128 control (**Figure S4A**). Although the testis weight of *Dcst1*<sup>d1/d1</sup> was slightly reduced  
129 [testis weight (mg)/body weight (g): 3.13 ± 0.19 (*Dcst1*<sup>d1/wt</sup>), 2.56 ± 0.27 (*Dcst1*<sup>d1/d1</sup>),  
130 3.88 ± 0.34 (*Dcst2*<sup>d25/wt</sup>), 3.60 ± 0.28 (*Dcst2*<sup>d25/d25</sup>)] (**Figure S4B**), PAS-hematoxylin

131 staining revealed no overt defects in spermatogenesis of *Dcst1*<sup>d1/d1</sup> and *Dcst2*<sup>d25/d25</sup>  
132 males (**Figure S4C**). The sperm morphology and motility parameters of *Dcst1*<sup>d1/d1</sup> and  
133 *Dcst2*<sup>d25/d25</sup> mice were normal (**Figure S5**). However, when the mutant spermatozoa  
134 were incubated with cumulus-intact wild-type (wt) eggs *in vitro*, they accumulated in  
135 the perivitelline space and could not fertilize eggs [ $96.5 \pm 7.1\%$  (Ctrl, 231 eggs), 0%  
136 (*Dcst1*<sup>d1/d1</sup>, 97 eggs), and 0% (*Dcst2*<sup>d25/d25</sup>, 197 eggs)] (**Figure 1D-E and Movies S1-2**).  
137 Furthermore, even when these KO spermatozoa were incubated with ZP-free eggs, only  
138 one egg and no eggs were fertilized with *Dcst1* KO spermatozoa and *Dcst2* KO  
139 spermatozoa, respectively [100% (Ctrl, 142 eggs),  $0.8 \pm 1.6\%$  (*Dcst1*<sup>d1/d1</sup>, 94 eggs), 0%  
140 (*Dcst2*<sup>d25/d25</sup>, 88 eggs)] (**Figure 1F**).

141  
142 **Spermatozoa from *Dcst1*<sup>d1/d1</sup> and *Dcst2*<sup>d25/d25</sup> mice can bind to, but not fuse with**  
143 **eggs.**

144 To examine the binding and fusion ability of *Dcst1*<sup>d1/d1</sup> and *Dcst2*<sup>d25/d25</sup> mutant  
145 spermatozoa, we incubated these mutant spermatozoa with zona pellucida (ZP)-free  
146 eggs. Both mutant spermatozoa could bind to the oolemma [ $5.72 \pm 1.97$  (Ctrl, 113 eggs),  
147  $7.64 \pm 4.68$  (*Dcst1*<sup>d1/d1</sup>, 89 eggs),  $7.63 \pm 3.45$  (*Dcst2*<sup>d25/d25</sup>, 89 eggs)] (**Figure 2A and B**).  
148 Because binding is not defective in mutant spermatozoa, we confirmed that IZUMO1, a  
149 key factor in this process, was expressed and localized normally in testicular germ cells  
150 (TGC) and spermatozoa of *Dcst1*<sup>d1/d1</sup> and *Dcst2*<sup>d25/d25</sup> males (**Figure 2C**). Indeed, we  
151 found that the level of IZUMO1 in mutant spermatozoa was comparable to the control  
152 (**Figure 2C**). Moreover, there was no difference in the acrosome reaction rate of  
153 oolemma-bound spermatozoa between control, *Dcst1*<sup>d1/d1</sup> and *Dcst2*<sup>d25/d25</sup> males,  
154 determined by live-cell staining with IZUMO1 antibody [ $58.9 \pm 17.9\%$  (Ctrl),  $80.5 \pm$   
155  $4.6\%$  (*Dcst1*<sup>d1/d1</sup>),  $63.5 \pm 6.5\%$  (*Dcst2*<sup>d25/d25</sup>)] (**Figure 2D and E**). Next, the mutant  
156 spermatozoa were incubated with Hoechst 33342-preloaded ZP-free eggs. In  
157 experiments with control spermatozoa, Hoechst 33342 fluorescence signal was  
158 translocated into sperm heads (**Figure 2F**), indicating that these spermatozoa fused with  
159 the egg membrane. However, Hoechst 33342 signal was rarely detected in *Dcst1* KO  
160 and *Dcst2* KO spermatozoa bound to the oolemma [fused spermatozoa/egg:  $1.52 \pm 0.35$   
161 (Ctrl, 113 eggs),  $0.04 \pm 0.05$  (*Dcst1*<sup>d1/d1</sup>, 73 eggs), 0 (*Dcst2*<sup>d25/d25</sup>, 73 eggs)] (**Figure 2F**  
162 **and G**). Thus, *Dcst1* and *Dcst2* KO spermatozoa can bind to eggs but not fuse with  
163 them.

164  
165 **Sterility of *Dcst1*<sup>d1/d1</sup> and *Dcst2*<sup>d25/d25</sup> males is rescued by *Dcst1*-3xHA and *Dcst2*-**  
166 **3xHA transgenes.**

167 To confirm that the *Dcst1* and *Dcst2* disruptions are responsible for male sterility, we  
168 generated transgenic mice in which a testis-specific Calmegin (*Clgn*) promoter  
169 expresses mouse DCST1 and DCST2 with a HA tag at the C-terminus (**Figure S6A and**  
170 **B**). When *Dcst1*<sup>d1/d1</sup> males with the *Dcst1*-3xHA transgene and *Dcst2*<sup>d25/d25</sup> males with  
171 the *Dcst2*-3xHA transgene were mated with *wt/wt* females, the females delivered  
172 normal numbers of offspring [pups/plug:  $5.7 \pm 0.5$  (*Dcst1*<sup>d1/d1</sup>; Tg, 25 plugs),  $7.6 \pm 2.7$   
173 (*Dcst2*<sup>d25/d25</sup>; Tg, 15 plugs)] (**Figure 3A**). We could detect HA-tagged DCST1 and HA-  
174 tagged DCST2 in TGCs and spermatozoa at the expected sizes for the full-length  
175 proteins (**Figure 3B**, arrowheads), though both proteins appear to be subject to post-  
176 translational processing/protein degradation.

177

178 To reveal the localization of DCST1 and DCST2 in spermatozoa, we performed  
179 immunocytochemistry with an antibody detecting the HA epitope and peanut agglutinin  
180 (PNA) as a marker for the sperm acrosome reaction. As shown in **Figure 3C**, PNA in  
181 the anterior acrosome was translocated to the equatorial segment after the acrosome  
182 reaction as shown previously<sup>27</sup>. While HA-tagged DCST1 could rarely be observed in  
183 spermatozoa, HA-tagged DCST2 was detected within the anterior acrosome of  
184 acrosome-intact spermatozoa, and then translocated to the equatorial segment after the  
185 acrosome reaction (**Figure 3C**), mirroring the relocalization of IZUMO1 upon the  
186 acrosome reaction<sup>28</sup>. The fluorescence in the sperm tail was observed in both control  
187 and *Dcst2-HA* Tg spermatozoa, indicating that the signal in the tail was non-specific  
188 (**Figure 3C**).

189  
190 Taking advantage of the HA tag, we obtained co-immunoprecipitation (co-IP) samples.  
191 While HA-tagged DCST1 was detected only in TGCs, HA-tagged DCST2 was detected  
192 in both TGCs and spermatozoa (**Figure 3D**). We could not detect IZUMO1 in these IP  
193 samples (**Figure 3D**), suggesting that DCST1 and DCST2 do not form a complex with  
194 IZUMO1. Since both DCSTs are tagged with HA, we could not examine their  
195 interaction *in vivo*. Instead, we could confirm the presence of the DCST1/DCST2  
196 complex when we expressed *Dcst1-3xFLAG* and *Dcst2-3xHA* in HEK293T cells  
197 (**Figure 3E**).

198  
199 **HEK293T cells expressing DCST1/2 and IZUMO1 bind to but do not fuse with ZP-**  
200 **free eggs.**

201 To assess whether DCST1 and DCST2 are sufficient for inducing sperm-egg fusion, we  
202 overexpressed *Dcst1-3xFLAG*, *Dcst2-3xHA*, and *Izumo1-1D4* in HEK293T cells  
203 (**Figure 4A**). HEK293T cells overexpressing IZUMO1 could bind to, but not fuse with,  
204 ZP-free eggs (**Figure 4B**), which was consistent with previous reports<sup>4,11</sup>. In contrast,  
205 HEK293T cells overexpressing DCST1 and DCST2 failed to bind to ZP-free eggs  
206 (**Figure 4B and C**). Co-expression of IZUMO1 and DCST1/2 allowed the cells to bind  
207 to ZP-free eggs [ $4.24 \pm 2.41$  cells/eggs (IZUMO1),  $2.01 \pm 1.93$  cells/eggs (DCST1/2 +  
208 IZUMO1)], but did not facilitate fusion with the oolemma (**Figure 4B and C**). Thus,  
209 though DCST1 and DCST2 appear to have a role in the sperm-egg fusion process, they  
210 are not sufficient to induce fusion, even in conjunction with IZUMO1.

211  
212 **Sperm-expressed *Dcst1/2* are also required for fertilization in zebrafish.**

213 DCST1/2 are widely conserved and expressed in the male germ line of many metazoans,  
214 which is remarkable for the otherwise rapidly evolving group of sperm-egg interacting  
215 proteins<sup>29,30</sup>. To assess to what extent our findings in mice could be expanded among  
216 vertebrate species, we asked what the roles of DCST1/2 are in an evolutionarily distant  
217 vertebrate species, the zebrafish. The orthologous zebrafish genes *dcst1* and *dcst2* are  
218 expressed specifically in testis and arranged similarly to mouse *Dcst1/2* (**Figure S7A**  
219 **and B**). We therefore generated three independent KO fish lines, *dcst1* (*dcst1*<sup>-/-</sup>), *dcst2*  
220 (*dcst2*<sup>-/-</sup>), or both (*dcst1/2*<sup>-/-</sup>), by CRISPR/Cas9-mediated mutagenesis (**Figure S7B and**  
221 **C**).

222 Lack of zebrafish *Dcst2* alone or in combination with *Dcst1* caused complete sterility in  
223 males, whereas lack of *Dcst1* alone led to severe subfertility [ $5.5 \pm 3.6\%$  fertilization  
224 rate (*dcst1*<sup>-/-</sup>, 16 clutches)] (**Figure 5A**). The fertility of heterozygous males and KO

225 females, however, was comparable to the *wt/wt* control males. (**Figure 5A**). Thus,  
226 similar to mice, *Dcst1/2* are essential for male fertility in zebrafish. For further  
227 phenotypic analyses we decided to focus on the *dcst2<sup>-/-</sup>* mutant (unless stated otherwise),  
228 since loss of *Dcst2* is sufficient to cause complete sterility.

229

230 To understand what causes the fertility defect, we determined whether spermatozoa  
231 were produced in mutant males and where *Dcst* proteins were localized in *wt/wt* males.  
232 *Dcst1<sup>-/-</sup>* and *dcst2<sup>-/-</sup>* males showed normal mating behavior and produced  
233 morphologically normal spermatozoa, indicating that zebrafish *Dcst1/2* are not crucial  
234 for spermatogenesis (**Figure 5B**). Because zebrafish sperm lack an acrosome, we  
235 examined the localization of *Dcst2*. To this end, we produced antibodies against the C-  
236 terminal RING finger domain of zebrafish *Dcst2*. *Dcst2* antibodies could detect  
237 zebrafish *Dcst2* protein as determined by western blotting of *wt* and *dcst2<sup>-/-</sup>* sperm  
238 lysates (**Figure S7D**) and immunofluorescence staining of *Dcst2*-superfolder GFP  
239 (sfGFP) overexpression in the zebrafish embryo (**Figure S7E**). Interestingly,  
240 immunofluorescence against *Dcst2* strongly stained *wt* spermatozoa at the periphery of  
241 the head in punctae and occasionally the mid-piece (**Figure 5C**). Weaker staining of the  
242 tail region was also detected in *dcst2<sup>-/-</sup>* spermatozoa, suggesting that this signal was  
243 unrelated to *Dcst2*. Thus, *Dcst2* localizes to the plasma membrane of the sperm head.

244

245 When added to *wt* eggs, *dcst2<sup>-/-</sup>* spermatozoa were able to locate and enter the micropyle,  
246 the funnel-shaped site of sperm entry (**Figure 5D**), but most of the entering mutant  
247 spermatozoa were expelled from the micropyle shortly thereafter. We therefore  
248 conclude that *Dcst2* is neither required for overall sperm motility nor for spermatozoa to  
249 approach and enter the micropyle. After entering the micropyle, *wt* zebrafish  
250 spermatozoa immediately bind to the oolemma. We previously established an assay to  
251 assess sperm-egg binding during zebrafish fertilization<sup>31</sup>. Building on this assay, we  
252 used live imaging of spermatozoa and eggs to quantify the number of sperm adhered to  
253 the oolemma within a physiologically relevant time frame [ $1.97 \pm 0.97$  spermatozoa/100  
254  $\mu\text{m}$  (12 eggs)] (**Figure 5E and F**). Employing this assay with *dcst2<sup>-/-</sup>* spermatozoa  
255 revealed that *dcst2<sup>-/-</sup>* spermatozoa are unable to adhere to *wt* eggs stably [ $0.05 \pm 0.1$   
256 spermatozoa/100  $\mu\text{m}$  (9 eggs)] (**Figure 5E and F**). We therefore conclude that zebrafish  
257 *Dcst2* is required for stable binding of spermatozoa to the oolemma.

258

259

260

## Discussion

261

262

263

264

265

266

267

268

269

270

271

Similar to a previous study suggesting that OCSTAMP and DCSTAMP form a dimer or oligomer on the cell surface as part of a receptor complex<sup>32</sup>, our study revealed that DCST1 and DCST2 interact when overexpressed in somatic cells (**Figure 3E**),

272 implying the formation of a stable DCST1/2 complex on the sperm membrane. We  
273 detected mouse DCST2 at the equatorial segment of acrosome-reacted spermatozoa and  
274 zebrafish *Dcst2* at the periphery of the sperm head. Given that DCST1/2 are TM  
275 proteins, these localization patterns suggest that part of the protein is exposed on the  
276 sperm surface. We therefore speculate that DCST1/2 either helps organize the fusion-  
277 competent sperm membrane or directly interacts with other binding- and/or fusion-  
278 relevant molecules on the oolemma. To test this hypothesis, we overexpressed DCST1  
279 and DCST2 in IZUMO1-expressing HEK293T cells. These cells could bind to but not  
280 fuse with ZP-free eggs (**Figure 4B-C**), which could be due to lack of other sperm-  
281 oocyte fusion-related factors (FIMP, SOF1, TMEM95, and SPACA6). It is difficult to  
282 stably express all sperm fusion-related factors (DCST1/2, IZUMO1, FIMP, SOF1,  
283 TMEM95, and SPACA6) in culture cells as we have shown in **Figure 4A**. Future  
284 investigations need to optimize the experimental conditions of gamete fusion using  
285 culture cells and ZP-free eggs.

286  
287 The function of DCST1/2 in the sperm-egg fusion process differs between mice and  
288 fish: mouse DCST1/2 are required for the fusion process after sperm-egg binding  
289 (**Figure 2**), and zebrafish *Dcst1/2* are required for the sperm-egg binding (**Figure 5**).  
290 Fertilization-related factors are known to be among the most rapidly evolving  
291 proteins<sup>29,30</sup>. Given the intrinsic diversity of the fertilization process across the animal  
292 kingdom, it may be that while DCST proteins are highly conserved, they may have  
293 evolved different roles to fit into the specific context of fertilization for a given species  
294 or animal group. As we presented here, application of the CRISPR/Cas9-mediated KO  
295 screening in a wide variety of animals will shed light on the fundamental mechanism of  
296 fertilization and its diversification during evolution.

## 297 **Materials and Methods**

### 298 **Animals.**

299 B6D2F1, C57BL/6J, and ICR mice were purchased from Japan SLC and CLEA Japan.  
300 Mice were acclimated to 12-h-light/12-h-dark cycle. All animal experiments were  
301 approved by the Animal Care and Use Committee of the Research Institute for  
302 Microbial Diseases, Osaka University, Japan (#Biken-AP-H30-01).

303 Zebrafish (*Danio rerio*) were raised according to standard protocols (28°C water  
304 temperature; 14/10-hour light/dark cycle). TLAB zebrafish served as *wt/wt* zebrafish for  
305 all experiments, and were generated by crossing zebrafish AB stocks with natural  
306 variant TL (Tüpfel longfin) stocks. *Dcst1*<sup>-/-</sup>, *dcst2*<sup>-/-</sup>, and *dcst1/2*<sup>-/-</sup> mutant zebrafish were  
307 generated as part of this study as described in detail below. All fish experiments were  
308 conducted according to Austrian and European guidelines for animal research and  
309 approved by the local Austrian authorities (animal protocol GZ: 342445/2016/12).

310

### 311 **Mouse sample collection.**

312 Multi-tissue expression analyses were conducted as described previously<sup>11</sup>. For western  
313 blotting, TGC proteins were extracted with Pierce IP lysis buffer (Thermo Fisher  
314 Scientific) (**Figure 3B and D**) or RIPA buffer [50 mM Tris HCl, 0.15 M NaCl, 1%  
315 Sodium deoxycholate, 0.1% SDS, 1% (vol/vol) TritonX-100, pH 7.5] containing a 1%  
316 (vol/vol) protease inhibitor mixture (Nacalai Tesque) (**Figure 2C**). Proteins of cauda  
317 epididymal spermatozoa were extracted with Pierce IP lysis buffer containing a 1%  
318 (vol/vol) protease inhibitor mixture (**Figure 3D**) or SDS sample buffer containing β-  
319 mercaptoethanol (Nacalai Tesque) (**Figures 2C and 3B**) as described previously<sup>33</sup>.

320

### 321 **RT-PCR for mouse multi-tissue expression analyses.**

322 Total RNA was reverse-transcribed into cDNA using a SuperScript III First-Strand  
323 Synthesis System for RT-PCR (Invitrogen). PCR was conducted with primer sets  
324 (**Table S1**) and KOD-Fx neo (TOYOBO). The PCR conditions were initial denaturation  
325 at 94°C for 3 minutes, denaturing at 94°C for 30 seconds, annealing at 65°C for 30  
326 seconds, and elongation at 72°C for 30 seconds for 30 or 35 cycles in total, followed by  
327 72°C for 2 minutes.

328

### 329 **Single cell RNA-seq (scRNAseq) analysis.**

330 The Median-Normalized average of *Dcst1*, *Dcst2* and fusion-related genes (*Fimp*,  
331 *Izumo1*, *Sof1*, *Spaca6*, and *Tmem95*) in spermatogenesis was examined in the published  
332 scRNAseq database<sup>26</sup>.

333

### 334 **Mouse mating test.**

335 KO male mice were caged with two B6D2F1 females for more than 1 month. After the  
336 mating period, male mice were removed from the cages, and the females were kept for  
337 another 20 days to allow them to deliver offspring. Frozen spermatozoa from *Dcst1*<sup>d1/wt</sup>  
338 males [B6D2-Dcst1<em>Osb</em> RBRC#10332, CARD#2702] and *Dcst2*<sup>d25/wt</sup> males  
339 [B6D2-Dcst2<em>Osb</em> Tg(CAG/Su9-DsRed2,Acr3-EGFP)RBGS002Osb,  
340 RBRC#11243, CARD#3047] will be available through RIKEN BRC  
341 (<http://en.brc.riken.jp/index.shtml>) and CARD R-BASE ([http://cardb.cc.kumamoto-](http://cardb.cc.kumamoto-u.ac.jp/transgenic/)  
342 [u.ac.jp/transgenic/](http://cardb.cc.kumamoto-u.ac.jp/transgenic/)).

343



344 **Mouse sperm motility and *in vitro* fertilization.**

345 Cauda epididymal spermatozoa were squeezed out and dispersed in PBS (for sperm  
346 morphology) and TYH (for sperm motility and IVF)<sup>34</sup>. After incubation of 10 and 120  
347 minutes in TYH, sperm motility patterns were examined using the CEROS II sperm  
348 analysis system<sup>35-37</sup>. IVF was conducted as described previously<sup>38</sup>. Protein extracts from  
349 the remaining sperm suspension in PBS and TYH drops were used for co-IP  
350 experiments.

351

352 **Antibodies.**

353 Rat monoclonal antibodies against mouse IZUMO1 (KS64-125) and mouse SLC2A3  
354 (KS64-10) were generated by our laboratory as described previously<sup>39,40</sup>. The mouse  
355 monoclonal antibody against 1D4-tag was generated using a hybridoma cell line as a  
356 gift from Robert Molday, Ophthalmology and Visual Sciences, Centre for Macular  
357 Research, University of British Columbia, Vancouver, British Columbia, Canada<sup>41</sup>.  
358 Mouse monoclonal antibodies against the HA and FLAG tags were purchased from  
359 MBL (M180-3) and Sigma (F3165). The Alexa Fluor 488-conjugated Lectin PNA from  
360 *Arachis hypogaea* (peanut) was purchased from Thermo Fisher Scientific (L21409).  
361 The mouse monoclonal antibody against zebrafish Dcst2 was generated by the Max  
362 Perutz Labs Monoclonal Antibody Facility. Recombinant zebrafish Dcst2 (574-709),  
363 generated by VBCF Protein Technologies, served as the antigen. Horseradish  
364 peroxidase (HRP)-conjugated goat anti-mouse immunoglobulins (IgGs) (115-036-062)  
365 and HRP-conjugated goat anti-rat IgGs (112-035-167) were purchased from Jackson  
366 ImmunoResearch Laboratories. Fluorophore-conjugated secondary antibodies, goat  
367 anti-mouse IgG Alexa Fluor 488 (A11001), goat anti-mouse IgG Alexa Fluor 546  
368 (A11018), goat anti-mouse IgG Alexa Fluor 594 (A11005), and goat anti-rat IgG Alexa  
369 Fluor 488 (A11006) were purchased from Thermo Fisher Scientific.

370

371 **Mouse sperm fusion assay.**

372 The fusion assay was performed as described previously<sup>11</sup>. To visualize IZUMO1  
373 distribution in spermatozoa, spermatozoa after incubation of 2.5 hours in TYH drops  
374 were then incubated with the IZUMO1 monoclonal antibody (KS64-125, 1:100) for 30  
375 minutes. Then, the spermatozoa were incubated with ZP-free eggs in TYH drops with  
376 the mixture of IZUMO1 monoclonal antibody (KS64-125, 1:100) and goat anti-rat IgG  
377 Alexa Fluor 488 (1:200) for 30 minutes. Then, the eggs were gently washed with a 1:1  
378 mixture of TYH and FHM medium three times, and then fixed with 0.2% PFA. After  
379 washing again, IZUMO1 localization was observed under a fluorescence microscope  
380 (BZ-X700, Keyence).

381

382 **HEK293T-oocyte binding assay.**

383 Mouse *Dcst1* ORF-3xFLAG, mouse *Dcst2* ORF-3xHA, mouse *Izumo1* ORF-1D4 with a  
384 Kozak sequence (gccgcc) and a rabbit polyadenylation [poly (A)] signal were inserted  
385 under the CAG promoter. These plasmids (0.67 µg/each, total 2 µg) were transfected  
386 into HEK293T cells using the calcium phosphate-DNA coprecipitation method<sup>42</sup>. After  
387 2 days of transfection, these cells were resuspended in PBS containing 10 mM  
388 (ethylenedinitrilo)tetraacetic acid. After centrifugation, the cells were washed with PBS,  
389 and then incubated with ZP-free eggs. After 30 minutes and then more than 6 hours of  
390 incubation, the attached and fused cell numbers were counted under a fluorescence

391 microscope (BZ-X700, Keyence) and an inverted microscope with relief phase contrast  
392 (IX73, Olympus). Proteins were extracted from the remaining HEK293T cells with a  
393 lysis buffer containing Triton-X 100 [50 mM NaCl, 10 mM Tris-HCl, 1% (vol/vol)  
394 Triton-X 100 (Sigma Aldrich), pH 7.5] containing 1% (vol/vol) protease inhibitor  
395 mixture, and then used for western blotting and co-IP.

396

#### 397 **Co-IP.**

398 Protein extracts [1 mg (TGC), 95~105  $\mu$ g (spermatozoa), and 200  $\mu$ g (HEK293T)] were  
399 incubated with anti-HA antibody coated Dynabeads Protein G for immunoprecipitation  
400 (10009D, Thermo Fisher Scientific) for 1 hour at 4°C. After washing with a buffer (50  
401 mM Tris-HCl, 150 mM NaCl, 0.1% Triton X-100, and 10% Glycerol, pH7.5), protein  
402 complexes were eluted with SDS sample buffer containing  $\beta$ -mercaptoethanol (for  
403 western blotting).

404

#### 405 **Western blotting.**

406 Before SDS-PAGE, samples were mixed with sample buffer containing  $\beta$ -  
407 mercaptoethanol<sup>33</sup>, and boiled at 98°C for 5 minutes. For mouse samples, the  
408 polyvinylidene difluoride (PVDF) membrane was treated with Tris-buffered saline  
409 (TBS)-0.1% Tween20 (Nacalai Tesque) containing 10% skim milk (Becton Dickinson  
410 and Company) for 1 hour, followed by the primary antibody [IZUMO1, SLC2A3, HA,  
411 and FLAG (1:1,000), 1D4 (1:5,000)] for 3 hours or overnight. After washing with  
412 TBST, the membrane was treated with secondary antibodies (1:1,000). For zebrafish  
413 samples, after wet transfer onto nitrocellulose, total protein was visualized by Ponceau  
414 staining before blocking with 5% milk powder in TBST. The primary antibody [mouse  
415 anti-zebrafish-Dcst2 (1:50 in blocking buffer)] was incubated overnight at 4°C. The  
416 membrane was washed with TBST before secondary antibody incubation for 1 hour.  
417 The HRP activity was visualized with ECL prime (BioRad) and Chemi-Lumi One Ultra  
418 (Nacalai Tesque) (for mouse) or ChemiDoc (BioRad) (for zebrafish). Then, the total  
419 proteins on the membrane were visualized with Coomassie Brilliant Blue (CBB)  
420 (Nacalai Tesque).

421

#### 422 **Immunocytochemistry.**

423 After 3 hour incubation of mouse spermatozoa in TYH drops, the spermatozoa were  
424 washed with PBS. The spermatozoa suspended with PBS were smeared on a slide glass,  
425 and then dried on a hotplate. The samples were fixed with 1% PFA, followed by  
426 permeabilizing with Triton-X 100. The spermatozoa were blocked with 10% goat serum  
427 (Gibco) for 1 hour, and then incubated with a mouse monoclonal antibody against HA  
428 tag (1:100) for 3 hours or overnight. After washing with PBS containing 0.05%  
429 (vol/vol) Tween 20, the samples were subjected to the mixture of a goat anti-mouse IgG  
430 Alexa Fluor 546 (1:300) and Alexa Fluor 488-conjugated Lectin PNA (1:2,000) for 1  
431 hour. After washing again, the samples were sealed with Immu-Mount (Thermo Fisher  
432 Scientific) and then observed under a phase contrast microscope (BX-50, Olympus)  
433 with fluorescence equipment.

434 Zebrafish spermatozoa were fixed with 3.7% formaldehyde immediately after collection  
435 at 4°C for 20 minutes. Spermatozoa were brought onto a SuperFrost Ultra Plus slide  
436 (Fisher Scientific) with a CytoSpin 4 (Thermo Fisher Scientific) at 1,000 rpm for 5  
437 minutes followed by permeabilization with ice-cold methanol for 5 minutes. The slide

438 was washed with PBS before blocking with 10% normal goat serum (Invitrogen) and 40  
439  $\mu\text{g}/\text{mL}$  BSA in PBST for 1 hour and then incubated with the mouse anti-zebrafish-Dcst2  
440 antibody (1:25) overnight at 4°C. After washing with PBST, the slide was incubated  
441 with goat anti-mouse IgG Alexa Fluor 488 (1:100) for 2 hours before washing with  
442 PBST once more. After mounting using VECTASHIELD Antifade with DAPI (Vector  
443 Laboratories), spermatozoa were imaged with an Axio Imager.Z2 microscope (Zeiss)  
444 with an oil immersion 63x/1.4 Plan-Apochromat DIC objective.

445

#### 446 **Fertility assessment of adult zebrafish.**

447 The evening prior to mating, the fish assessed for fertility and a TLAB *wt/wt* fish of the  
448 opposite sex were separated in breeding cages. The next morning, the fish were allowed  
449 to mate. Eggs were collected and kept at 28°C in E3 medium (5 mM NaCl, 0.17 mM  
450 KCl, 0.33 mM  $\text{CaCl}_2$ , 0.33 mM  $\text{MgSO}_4$ , 10<sup>-5</sup>% Methylene Blue). The rate of  
451 fertilization was assessed approximately 3 hours post-laying. By this time, fertilized  
452 embryos have developed to ~1000-cell stage embryos, while unfertilized eggs resemble  
453 one-cell stage embryos. Direct comparisons were made between siblings of different  
454 genotypes (*wt/wt*, heterozygous mutant, homozygous mutant).

455

#### 456 **Collection of zebrafish eggs and spermatozoa.**

457 Un-activated zebrafish eggs and spermatozoa were collected following standard  
458 procedures<sup>43</sup>. The evening prior to sperm collection, male and female zebrafish were  
459 separated in breeding cages (one male and one female per cage).

460 To collect mature, un-activated eggs, female zebrafish were anesthetized using 0.1%  
461 w/v tricaine (25x stock solution in dH<sub>2</sub>O, buffered to pH 7.0-7.5 with 1 M Tris pH 9.0).  
462 After being gently dried on a paper towel, the female was transferred to a dry petri dish,  
463 and eggs were carefully expelled from the female by applying mild pressure on the fish  
464 belly with a finger and stroking from anterior to posterior. The eggs were separated  
465 from the female using a small paintbrush, and the female was transferred back to the  
466 breeding cage filled with fish water for recovery.

467 To collect *wt* or mutant spermatozoa, male zebrafish were anesthetized using 0.1%  
468 tricaine. After being gently dried on a paper towel, the male fish was placed belly-up in  
469 a slit in a damp sponge under a stereomicroscope with a light source from above.  
470 Spermatozoa were collected into a glass capillary by mild suction while gentle pressure  
471 was applied to the fish's belly. Spermatozoa were stored in ice-cold Hank's saline  
472 (0.137 M NaCl, 5.4 mM KCl, 0.25 mM  $\text{Na}_2\text{HPO}_4$ , 1.3 mM  $\text{CaCl}_2$ , 1 mM  $\text{MgSO}_4$ , and  
473 4.2 mM  $\text{NaHCO}_3$ ). The male was transferred back to the breeding cage containing fish  
474 water for recovery. For western blot analysis, spermatozoa from 3 males was  
475 sedimented at 800 x *g* for 5 minutes. The supernatant was carefully replaced with 25  $\mu\text{L}$   
476 RIPA buffer [50 mM Tris-HCl (pH 7.5), 150 mM NaCl, 1 mM  $\text{MgCl}_2$ , 1% NP-40, 0.5%  
477 sodium deoxycholate, 1X complete protease inhibitor (Roche)] including 1% SDS and 1  
478 U/ $\mu\text{L}$  benzonase (Merck). After 10 minutes of incubation at RT, the lysate was mixed  
479 and sonicated 3 times for 15 seconds of 0.5-second pulses at 80% amplitude (UP100H,  
480 Hielscher) interspersed by cooling on ice.

481

#### 482 **Zebrafish sperm approach and binding assays.**

483 Imaging of zebrafish sperm approach

484 Spermatozoa were squeezed from 2–4 *wt/wt* male fish and kept in 150  $\mu$ l Hank’s saline  
485 containing 0.5  $\mu$ M MitoTracker Deep Red FM (Molecular Probes) for >10 minutes on  
486 ice. Un-activated, mature eggs were obtained by squeezing a *wt/wt* female. To prevent  
487 activation, eggs were kept in sorting medium (Leibovitz’s medium, 0.5 % BSA, pH 9.0)  
488 at RT. The eggs were kept in place using a petri dish with cone-shaped agarose molds  
489 (1.5% agarose in sorting medium) filled with sorting medium. Imaging was performed  
490 with a LSM800 Examiner Z1 upright system (Zeiss) with a 20x/1.0 Plan-Apochromat  
491 water dipping objective. Before sperm addition, sorting media was removed and 1 mL  
492 of E3 medium was carefully added close to the egg. Five to ten  $\mu$ l of the stained  
493 spermatozoa was added as close to the egg as possible during image acquisition. The  
494 resulting time-lapse movies were analyzed using FIJI.

495

#### 496 Imaging and analysis of zebrafish sperm-egg binding

497 Spermatozoa was squeezed from 2–4 male fish and kept in 100  $\mu$ L Hank’s saline + 0.5  
498  $\mu$ M MitoTracker Deep Red FM on ice. Un-activated, mature eggs were squeezed from a  
499 *wt/wt* female fish and activated by addition of E3 medium. After 10 minutes, 1-2 eggs  
500 were manually dechorionated using forceps and transferred to a cone-shaped imaging  
501 dish with E3 medium. After focusing on the egg plasma membrane, the objective was  
502 briefly lifted to add 2-10  $\mu$ L of stained spermatozoa (approximately 200,000-250,000  
503 spermatozoa). Imaging was performed with a LSM800 Examiner Z1 upright system  
504 (Zeiss) using a 10x/0.3 Achroplan water dipping objective. Images were acquired until  
505 spermatozoa was no longer motile (5 minutes). To analyze sperm-egg binding, stably-  
506 bound spermatozoa were counted. Spermatozoa were counted as bound when they  
507 remained in the same position for at least 1 minute following a 90-second activation and  
508 approach time window. Data was plotted as number of spermatozoa bound per 100  $\mu$ m  
509 of egg membrane.

510

#### 511 **Statistical analyses.**

512 All values are shown as the mean  $\pm$  SD of at least three independent experiments.  
513 Statistical analyses were performed using the two-tailed Student’s t-test, Mann-Whitney  
514 U-test, and Steel-Dwass test after examining the normal distribution and variance. For  
515 zebrafish data, statistical analyses were performed in GraphPad Prism 7 software.

516

#### 517 **Data availability statement**

518 RNA-seq data reported here (zebrafish adult tissues) were deposited at the Gene  
519 Expression Omnibus (GEO) and are available under GEO acquisition number  
520 GSE171906. The authors declare that the data that support the findings of this study are  
521 available from the corresponding authors upon request.

522

523

524 **ACKNOWLEDGMENTS.** We thank Natsuki Furuta, Eri Hosoyamada, Naoko  
525 Nagasawa, and the Biotechnology Research and Development (nonprofit organization)  
526 for excellent technical assistance; Carina Pribitzer for RNA-Seq library preparation for  
527 zebrafish adult tissues; Mirjam Binner, Anna Kogan and the animal facility personnel  
528 from the IMP for help with genotyping and taking excellent care of zebrafish; Karin  
529 Aumayr and her team of the biooptics facility at the Vienna BioCenter (VBC) for  
530 support with microscopy; the Protein Technology Facility and the Next Generation

531 Sequencing Facility at Vienna BioCenter Core Facilities (VBCF) for recombinant  
532 protein expression and zebrafish adult tissue RNA-Seq, respectively; the Max Perutz  
533 Labs Monoclonal Antibody Facility for generating anti-zebrafish Dcst2 antibodies; the  
534 entire Pauli lab for fruitful discussions, and Ms Ferheen Abbasi for critical reading of  
535 the manuscript. This work was supported by Ministry of Education, Culture, Sports,  
536 Science and Technology/Japan Society for the Promotion of Science KAKENHI  
537 (Grants-in-Aid for Scientific Research) Grants JP18K14612 and JP20H03172 to T.N.,  
538 JP15H05573, JP16KK0180, and JP20KK0155 to Y.F., JP19J21619 to S.O., and  
539 JP19H05750, JP21H04753 to M.I.; Japan Agency for Medical Research and  
540 Development Grant JP21gm5010001 to M.I.; Takeda Science Foundation grants to T.N.,  
541 Y.F. and M.I.; Mochida Memorial Foundation for Medical and Pharmaceutical  
542 Research grant to Y.F.; The Sumitomo Foundation Grant for Basic Science Research  
543 Projects to Y.F.; Senri Life Science Foundation grant to Y.F.; Intramural Research Fund  
544 (grants 30-2-5 and 31-6-3) for Cardiovascular Diseases of National Cerebral and  
545 Cardiovascular Center to Y.F.; Eunice Kennedy Shriver National Institute of Child  
546 Health and Human Development Grants R01HD088412 and P01HD087157 to M.I.; and  
547 the Bill & Melinda Gates Foundation (grant INV-001902 to M.I.). Work in the Pauli lab  
548 has been supported by the FWF START program (Y 1031-B28 to A.P.), the HFSP  
549 Career Development Award (CDA00066/2015 to A.P.), a HFSP Young Investigator  
550 Award to A.P., EMBO-YIP funds to A.P., a Boehringer Ingelheim Fonds (BIF) PhD  
551 fellowship to A.B., a HFSP postdoctoral fellowship to V.E.D., and a DOC PhD student  
552 fellowship from the Austrian Academy of Sciences to K.R.G. The IMP receives  
553 institutional funding from Boehringer Ingelheim and the Austrian Research Promotion  
554 Agency (Headquarter grant FFG-852936).

555

556

557 **Author Contributions:** T.N., A.P. and M.I. conceptualized research; T.N., A.B., Y.F.,  
558 K.R.G., C.E., V.E.D., S.O., S.B., M.K., and K.P. performed research; T.N., A.B., Y.F.,  
559 K.R.G., C.E., V.E.D., S.B., K.P., and M.I. analyzed data; L.E.C.Q. performed analysis  
560 of RNA-Seq data; and T.N. , A.B., K.R.G., V.E.D., A.P. and M.I. wrote the paper.

561

562

563 **Conflict of Interest Statement:** The authors declare no conflict of interest.

564 **References**

- 565 1 Bianchi, E., Doe, B., Goulding, D. & Wright, G. J. Juno is the egg Izumo  
566 receptor and is essential for mammalian fertilization. *Nature* **508**, 483-487  
567 (2014).
- 568 2 Inoue, N., Ikawa, M., Isotani, A. & Okabe, M. The immunoglobulin superfamily  
569 protein Izumo is required for sperm to fuse with eggs. *Nature* **434**, 234-238  
570 (2005).
- 571 3 Inoue, N. et al. Molecular dissection of IZUMO1, a sperm protein essential for  
572 sperm-egg fusion. *Development* **140**, 3221-3229 (2013).
- 573 4 Inoue, N., Hagihara, Y., Wright, D., Suzuki, T. & Wada, I. Oocyte-triggered  
574 dimerization of sperm IZUMO1 promotes sperm-egg fusion in mice. *Nat*  
575 *Commun* **6**, 8858 (2015).
- 576 5 Miyado, K. et al. Requirement of CD9 on the egg plasma membrane for  
577 fertilization. *Science* **287**, 321-324 (2000).
- 578 6 Le Naour, F., Rubinstein, E., Jasmin, C., Prenant, M. & Boucheix, C. Severely  
579 reduced female fertility in CD9-deficient mice. *Science* **287**, 319-321 (2000).
- 580 7 Kaji, K. et al. The gamete fusion process is defective in eggs of Cd9-deficient  
581 mice. *Nat Genet* **24**, 279-282 (2000).
- 582 8 Runge, K. E. et al. Oocyte CD9 is enriched on the microvillar membrane and  
583 required for normal microvillar shape and distribution. *Dev Biol* **304**, 317-325  
584 (2007).
- 585 9 Lamas-Toranzo, I. et al. TMEM95 is a sperm membrane protein essential for  
586 mammalian fertilization. *Elife* **9**, e53913 (2020).
- 587 10 Fujihara, Y. et al. Spermatozoa lacking Fertilization Influencing Membrane  
588 Protein (FIMP) fail to fuse with oocytes in mice. *Proc Natl Acad Sci U S A* **117**,  
589 9393-9400 (2020).
- 590 11 Noda, T. et al. Sperm proteins SOF1, TMEM95, and SPACA6 are required for  
591 sperm-oocyte fusion in mice. *Proc Natl Acad Sci U S A* **117**, 11493-11502  
592 (2020).
- 593 12 Barbaux, S. et al. Sperm SPACA6 protein is required for mammalian Sperm-  
594 Egg Adhesion/Fusion. *Sci Rep* **10**, 5335 (2020).
- 595 13 Witwicka, H. et al. Studies of OC-STAMP in Osteoclast Fusion: A New  
596 Knockout Mouse Model, Rescue of Cell Fusion, and Transmembrane Topology.  
597 *PLoS One* **10**, e0128275 (2015).
- 598 14 Yagi, M. et al. DC-STAMP is essential for cell-cell fusion in osteoclasts and  
599 foreign body giant cells. *J Exp Med* **202**, 345-351 (2005).
- 600 15 Miyamoto, H. et al. Osteoclast stimulatory transmembrane protein and dendritic  
601 cell-specific transmembrane protein cooperatively modulate cell-cell fusion to  
602 form osteoclasts and foreign body giant cells. *J Bone Miner Res* **27**, 1289-1297  
603 (2012).
- 604 16 Kodama, J. & Kaito, T. Osteoclast Multinucleation: Review of Current  
605 Literature. *Int J Mol Sci* **21** (2020).
- 606 17 Hartgers, F. C. et al. DC-STAMP, a novel multimembrane-spanning molecule  
607 preferentially expressed by dendritic cells. *Eur J Immunol* **30**, 3585-3590 (2000).
- 608 18 Eleveld-Trancikova, D. et al. The dendritic cell-derived protein DC-STAMP is  
609 highly conserved and localizes to the endoplasmic reticulum. *J Leukoc Biol* **77**,  
610 337-343 (2005).

- 611 19 Sawatani, Y. *et al.* The role of DC-STAMP in maintenance of immune tolerance  
612 through regulation of dendritic cell function. *Int Immunol* **20**, 1259-1268 (2008).
- 613 20 Kim, M. H., Park, M., Baek, S. H., Kim, H. J. & Kim, S. H. Molecules and  
614 signaling pathways involved in the expression of OC-STAMP during  
615 osteoclastogenesis. *Amino Acids* **40**, 1447-1459 (2011).
- 616 21 Wilson, K. L., Fitch, K. R., Bafus, B. T. & Wakimoto, B. T. Sperm plasma  
617 membrane breakdown during *Drosophila* fertilization requires sneaky, an  
618 acrosomal membrane protein. *Development* **133**, 4871-4879 (2006).
- 619 22 Fitch, K. R. & Wakimoto, B. T. The paternal effect gene ms(3)sneaky is  
620 required for sperm activation and the initiation of embryogenesis in *Drosophila*  
621 melanogaster. *Dev Biol* **197**, 270-282 (1998).
- 622 23 Wilson, L. D. *et al.* The *Caenorhabditis elegans* spe-49 gene is required for  
623 fertilization and encodes a sperm-specific transmembrane protein homologous to  
624 SPE-42. *Mol Reprod Dev* **85**, 563-578 (2018).
- 625 24 Kroft, T. L., Gleason, E. J. & L'Hernault, S. W. The spe-42 gene is required for  
626 sperm-egg interactions during *C. elegans* fertilization and encodes a sperm-  
627 specific transmembrane protein. *Dev Biol* **286**, 169-181 (2005).
- 628 25 Wilson, L. D. *et al.* Fertilization in *C. elegans* requires an intact C-terminal  
629 RING finger in sperm protein SPE-42. *BMC Dev Biol* **11**, 10 (2011).
- 630 26 Hermann, B. P. *et al.* The Mammalian Spermatogenesis Single-Cell  
631 Transcriptome, from Spermatogonial Stem Cells to Spermatids. *Cell Rep* **25**,  
632 1650-1667 e1658 (2018).
- 633 27 Yoshida, K. *et al.* A model of the acrosome reaction progression via the  
634 acrosomal membrane-anchored protein equatorin. *Reproduction* **139**, 533-544  
635 (2010).
- 636 28 Satouh, Y., Inoue, N., Ikawa, M. & Okabe, M. Visualization of the moment of  
637 mouse sperm-egg fusion and dynamic localization of IZUMO1. *J Cell Sci* **125**,  
638 4985-4990 (2012).
- 639 29 Palumbi, S. R. Speciation and the evolution of gamete recognition genes: pattern  
640 and process. *Heredity (Edinb)* **102**, 66-76 (2009).
- 641 30 Swanson, W. J. & Vacquier, V. D. The rapid evolution of reproductive proteins.  
642 *Nat Rev Genet* **3**, 137-144 (2002).
- 643 31 Herberg, S., Gert, K. R., Schleiffer, A. & Pauli, A. The Ly6/uPAR protein  
644 Bouncer is necessary and sufficient for species-specific fertilization. *Science* **361**,  
645 1029-1033 (2018).
- 646 32 Yang, M. *et al.* Osteoclast stimulatory transmembrane protein (OC-STAMP), a  
647 novel protein induced by RANKL that promotes osteoclast differentiation. *J Cell*  
648 *Physiol* **215**, 497-505 (2008).
- 649 33 Noda, T., Shidara, O. & Harayama, H. Detection of the activator cAMP  
650 responsive element modulator (CREM) isoform ortholog proteins in porcine  
651 spermatids and sperm. *Theriogenology* **77**, 1360-1368 (2012).
- 652 34 Toyoda Y, Yokoyama. M., Hoshi T. Studies on the fertilization of mouse eggs  
653 in vitro. I. In vitro fertilization of eggs by fresh epididymal sperm. *Jap. J. Anim.*  
654 *Reprod.* **16**, 147-151 (1971).
- 655 35 Noda, T. *et al.* Seminal vesicle secretory protein 7, PATE4, is not required for  
656 sperm function but for copulatory plug formation to ensure fecunditydagger.  
657 *Biol Reprod* **100**, 1035-1045 (2019).

- 658 36 Goodson, S. G., Zhang, Z., Tsuruta, J. K., Wang, W. & O'Brien, D. A.  
659 Classification of mouse sperm motility patterns using an automated multiclass  
660 support vector machines model. *Biol Reprod* **84**, 1207-1215 (2011).  
661 37 Matsumura, T. *et al.* Male mice, caged in the International Space Station for 35  
662 days, sire healthy offspring. *Sci Rep* **9**, 13733 (2019).  
663 38 Tokuhira, K., Ikawa, M., Benham, A. M. & Okabe, M. Protein disulfide  
664 isomerase homolog PDILT is required for quality control of sperm membrane  
665 protein ADAM3 and male fertility [corrected]. *Proc Natl Acad Sci U S A* **109**,  
666 3850-3855 (2012).  
667 39 Fujihara, Y. *et al.* Expression of TEX101, regulated by ACE, is essential for the  
668 production of fertile mouse spermatozoa. *Proc Natl Acad Sci U S A* **110**, 8111-  
669 8116 (2013).  
670 40 Ikawa, M. *et al.* Calsperin is a testis-specific chaperone required for sperm  
671 fertility. *J Biol Chem* **286**, 5639-5646 (2011).  
672 41 Molday, L. L. & Molday, R. S. 1D4: a versatile epitope tag for the purification  
673 and characterization of expressed membrane and soluble proteins. *Methods Mol*  
674 *Biol* **1177**, 1-15 (2014).  
675 42 Noda, T., Oji, A. & Ikawa, M. Genome Editing in Mouse Zygotes and  
676 Embryonic Stem Cells by Introducing SgRNA/Cas9 Expressing Plasmids.  
677 *Methods Mol Biol* **1630**, 67-80 (2017).  
678 43 Westerfield, M. *The zebrafish book. A guide for the laboratory use of zebrafish*  
679 *(Danio rerio)*. 4th edition (Univ. of Oregon Press, Eugene, 2000).  
680  
681

## 682 **Figure legends**

### 683 **Figure 1. Male fertility of *Dcst1* and *Dcst2* mutant mice.**

684 **A) Multi-tissue gene expression analysis.** *Dcst1* and *Dcst2* are abundantly expressed  
685 in the mouse testis. Beta actin (*Actb*) was used as the loading control. Br, brain; Th,  
686 thymus; Lu, lung; He, heart; Li, liver; Sp, spleen; Ki, kidney; Te, testis; Ov, ovary; Ut,  
687 uterus.

688 **B) Median-normalized level of *Dcst1* and *Dcst2* mRNA expression during mouse**  
689 **spermatogenesis.** *Dcst1* and *Dcst2* are strongly expressed in mid-round spermatids,  
690 corresponding to other fusion-related factors. Ud Sg, undifferentiated spermatogonia;  
691 A1-A2 Sg, A1-A2 differentiating spermatogonia; A3-B Sg, A3-A4-In-B differentiating  
692 spermatogonia; Prele Sc, preleptotene spermatocytes; Le/Zy Sc, leptotene/zygotene  
693 spermatocytes; Pa Sc, pachytene spermatocytes; Di/Se Sc, diplotene/secondary  
694 spermatocytes; Early St, early round spermatids; Mid St, mid round spermatids; Late St,  
695 late round spermatids; SC, Sertoli cells.

696 **C) Male fecundity.** Each male was caged with 2 *wt/wt* females for more than 1 month.  
697 *Dcst2*<sup>d25/wt</sup> and *del/wt* males were used as the control (Ctrl). *Dcst1*<sup>d1/d1</sup>, *Dcst2*<sup>d25/d25</sup>, and  
698 *Dcst2*<sup>del/del</sup> males succeeded in mating [number of plugs: 19 (Ctrl), 17 (*Dcst1*<sup>d1/d1</sup>), 42  
699 (*Dcst2*<sup>d25/d25</sup>), 24 (*Dcst2*<sup>del/del</sup>)], but the females very rarely delivered pups [pups/plug:  
700 9.0 ± 2.8 (Ctrl), 0.2 ± 0.2 (*Dcst1*<sup>d1/d1</sup>), 0 (*Dcst2*<sup>d25/d25</sup>), 0 (*Dcst2*<sup>del/del</sup>)].

701 **D) Egg observation after IVF.** After 8 hours of incubation, pronuclei were observed in  
702 the control spermatozoa (asterisks). However, *Dcst1* KO and *Dcst2* KO spermatozoa  
703 accumulated in the perivitelline space (arrows).

704 **E) Sperm fertilizing ability using cumulus-intact eggs *in vitro*.** *Dcst1* KO and *Dcst2*



705 KO spermatozoa could not fertilize eggs [fertilization rates:  $96.5 \pm 7.1\%$  (Ctrl, 231  
706 eggs),  $0\%$  (*Dcst1*<sup>d1/d1</sup>, 97 eggs),  $0\%$  (*Dcst2*<sup>d25/d25</sup>, 197 eggs)].

707 **F) Sperm fertilizing ability using ZP-free eggs in vitro.** *Dcst1* KO and *Dcst2* KO  
708 spermatozoa rarely fertilized eggs [fertilization rates:  $100\%$  (Ctrl, 142 eggs),  $0.8 \pm 1.6\%$   
709 (*Dcst1*<sup>d1/d1</sup>, 94 eggs),  $0\%$  (*Dcst2*<sup>d25/d25</sup>, 88 eggs)].

710

711 **Figure 2. Adhesion and fusion ability of *Dcst1* and *Dcst2* mutant spermatozoa to  
712 oocyte plasma membrane.**

713 **A and B) Binding ability.** *Dcst1* KO and *Dcst2* KO spermatozoa could bind to the  
714 oolemma after 30 minutes of incubation (panel A). There is no significant difference in  
715 the sperm number bound to the oolemma (panel B) [binding spermatozoa/oocyte:  $5.7 \pm$   
716  $2.0$  (Ctrl, 113 eggs),  $7.6 \pm 4.7$  (*Dcst1*<sup>d1/d1</sup>, 89 eggs),  $7.6 \pm 3.5$  (*Dcst2*<sup>d25/d25</sup>, 89 eggs)].  
717 N.S.: not significant ( $p > 0.05$ ).

718 **C) Detection of IZUMO1.** The band signals of IZUMO1 in TGC and spermatozoa of  
719 *Dcst1*<sup>d1/d1</sup> and *Dcst2*<sup>d25/d25</sup> male mice were comparable to the control. SLC2A3, one of  
720 proteins in sperm tail, was used as the loading control.

721 **D and E) Acrosome status of binding spermatozoa.** Live spermatozoa bound to the  
722 oolemma were stained with the IZUMO1 antibody, and IZUMO1 only in the acrosome  
723 reacted (AR) spermatozoa was detected (panel D). There are no significant differences  
724 in the rates of AR spermatozoa (panel E) [AR spermatozoa/binding spermatozoa:  $58.9 \pm$   
725  $17.9\%$  (Ctrl),  $80.5 \pm 4.6\%$  (*Dcst1*<sup>d1/d1</sup>),  $63.5 \pm 6.5\%$  (*Dcst2*<sup>d25/d25</sup>)]. N.S.: not significant  
726 ( $p = 0.13$ ).

727 **F and G) Fusion ability.** The ZP-free eggs pre-stained Hoechst 33342 were used for  
728 sperm-egg fusion assay. Hoechst 33342 signal transferred to control sperm heads,  
729 indicating that spermatozoa fused with eggs (panel F, arrow). However, *Dcst1* KO and  
730 *Dcst2* KO spermatozoa barely fused with eggs [fused spermatozoa/egg:  $1.52 \pm 0.35$   
731 (Ctrl, 113 eggs),  $0.04 \pm 0.05$  (*Dcst1*<sup>d1/d1</sup>, 73 eggs),  $0$  (*Dcst2*<sup>d25/d25</sup>, 73 eggs)].

732

733 **Figure 3. Detection of DCST1/2 in TGC and spermatozoa and interaction of  
734 DCST1/2.**

735 **A) Rescue of male fertility.** *Dcst1*<sup>d1/d1</sup> males with *Dcst1*-3xHA Tg insertion and  
736 *Dcst2*<sup>d25/d25</sup> males with *Dcst2*-3xHA Tg insertion were generated (**Figure S6**), and their  
737 fertility was rescued [number of plugs: 17 (*Dcst1*<sup>d1/d1</sup>), 25 (*Dcst1*<sup>d1/d1</sup>;Tg), 42  
738 (*Dcst2*<sup>d25/d25</sup>), 15 (*Dcst2*<sup>d25/d25</sup>;Tg)]. The fecundity data in *Dcst1*<sup>d1/d1</sup> and *Dcst2*<sup>d25/d25</sup>  
739 males is replicated from **Figure 1C**.

740 **B) Detection of DCST1 and DCST2 in TGC and spermatozoa.** The protein extract of  
741 TGC (100  $\mu$ g) and spermatozoa ( $6.6 \times 10^6$  spermatozoa) was used for SDS-PAGE. The  
742 HA-tagged DCST1 and HA-tagged DCST2 were detected in TGC and spermatozoa.  
743 Total proteins in the membrane were visualized by CBB staining. Triangle marks show  
744 the expected molecular size of DCST1 (about 80 kDa) and DCST2 (about 77 kDa).

745 **C) Localization of DCST2 in spermatozoa.** The HA-tagged DCST2 was localized in  
746 the anterior acrosome before the acrosome reaction, and then translocated to the  
747 equatorial segment in acrosome-reacted spermatozoa (arrows). PNA was used as a  
748 marker for the acrosome reaction. The fluorescence in the sperm tail was non-specific.

749 **D) Co-IP and western blotting of the interaction between IZUMO1 and DCST1/2.**  
750 The TGC and sperm lysates from Ctrl, *Dcst1*;Tg, and *Dcst2*;Tg males were incubated  
751 with anti-HA tag antibody-conjugated magnetic beads, and then the eluted protein

752 complex was subjected to western blotting. The HA-tagged DCST1 was detected only  
753 in the IP product from TGC, and the HA-tagged DCST2 was detected in the IP-product  
754 from TGC and spermatozoa. IZUMO1 was not detected in the co-IP products. Red and  
755 blue triangle marks show the expected molecular size of DCST1 (about 80 kDa) and  
756 DCST2 (about 77 kDa), respectively.

757 **E) Interaction between DCST1 and DCST2 in HEK293T cells.** The protein lysate  
758 collected from HEK cells overexpressing *Dcst1*-3xFLAG and *Dcst2*-3xHA was  
759 incubated with anti-HA tag antibody-conjugated magnetic beads. The FLAG-tagged  
760 DCST1 was detected in the eluted protein complex. ADAM1B, a sperm protein that  
761 localizes to the sperm surface and is not involved in sperm-egg fusion, was used for  
762 negative control.

763

764 **Figure 4. Binding assay between ZP-free eggs and HEK293T cells overexpressing**  
765 ***Dcst1/2*.**

766 **A) Detection of DCST1/2 and IZUMO1.** FLAG-tagged DCST1, HA-tagged DCST2,  
767 and 1D4-tagged IZUMO1 were detected in HEK293T cells overexpressing *Dcst1*-  
768 3xFLAG, *Dcst2*-3xHA, and *Izumo1*-1D4.

769 **B and C) Observation of ZP-free eggs incubated with HEK293T cells**  
770 **overexpressing *Dcst1/2* and *Izumo1*.** The HEK293T cells overexpressing *Dcst1* or  
771 *Dcst2* did not attach to the oocyte membrane. Even when the HEK cells overexpressing  
772 *Dcst1/2* were used for the assay, these cells failed to bind to ZP-free eggs. The  
773 HEK293T cells overexpressing *Dcst1/2* and *Izumo1* could bind to the oocyte membrane  
774 but could not fuse with an egg. N.S.: not significant (p = 0.28).

775

776 **Figure 5: *Dcst1* and *dcst2* are essential for male fertility in zebrafish.**

777 **A) *Dcst1* and *dcst2* mutant zebrafish are male sterile.** Quantification of fertilization  
778 rates as assessed by the number of embryos that progress beyond the one-cell stage. Left  
779 three panels: Males of different genotypes (*wt/wt* sibling (+/+; white); heterozygote  
780 sibling (+/-; light grey); homozygote sibling (-/-; dark grey)) were crossed to *wt/wt*  
781 females; right panel: homozygous mutant females (-/-; dark grey) of the indicated  
782 genotypes were crossed to *wt/wt* males. The number of individual clutches and the total  
783 number of eggs per genotype are indicated. Data are means  $\pm$  SD; adj. \*\*\*\*p < 0.0001  
784 (Kruskal-Wallis test with Dunn's multiple-comparisons test); n. s., not significant.

785 **B) *Dcst1* and *dcst2* mutant spermatozoa are morphologically normal.**  
786 Representative differential interference contrast images of spermatozoa from *wt/wt*,  
787 *dcst1*<sup>-/-</sup>, *dcst2*<sup>-/-</sup>, and *dcst1/2*<sup>-/-</sup> fish. Scale bar: 15  $\mu$ m.

788 **C) *Dcst2* localizes to the sperm head.** Immunofluorescent detection of *Dcst2* protein  
789 (cyan) in permeabilized zebrafish *wt* (top) or *dcst2*<sup>-/-</sup> (bottom) spermatozoa using an  
790 antibody recognizing the RING-finger domain of zebrafish *Dcst2*. A counterstain with  
791 DAPI (blue) detects the sperm DNA in the nucleus. Scale bar: 10  $\mu$ m.

792 **D) *Dcst2* mutant spermatozoa are motile and reach the micropyle.** Images from a  
793 time-lapse movie of *dcst2*<sup>-/-</sup> spermatozoa added to *wt* eggs. Spermatozoa (magenta)  
794 were labelled with MitoTracker and added to non-activated eggs. Spermatozoa and eggs  
795 were activated by addition of water just before the start of the movie. The micropyle  
796 (white arrow), a preformed funnel in the egg coat through which the spermatozoa reach  
797 the oolemma, is outlined with a dashed white line in the insets. Left image (36 seconds  
798 after activation and sperm addition): no spermatozoon has entered the micropylar area.

799 Right image (70 seconds after activation and sperm addition): spermatozoa can readily  
800 be detected within the micropylar area. Scale bar: 75  $\mu\text{m}$ .

801 **E-F) *Dcst2* mutant spermatozoa are defective in stable binding to wt eggs.** Images  
802 from a time-lapse movie of wt (left) or *dcst2*<sup>-/-</sup> (right) spermatozoa added to activated  
803 and dechorionated wt eggs. Spermatozoa (magenta) were labelled with MitoTracker and  
804 activated at the time of addition to the eggs. Wt spermatozoa show clear binding to the  
805 surface of the egg (inset), while *dcst2*<sup>-/-</sup> spermatozoa are unable to stably bind to the  
806 oolemma (E). Binding of spermatozoa was assessed by quantifying the number of  
807 stably-bound spermatozoa in a 1-min. time window (F). Scale bar: 100  $\mu\text{m}$ . \*\*\*\*p <  
808 0.0001 (Mann Whitney test).

# Figure 1

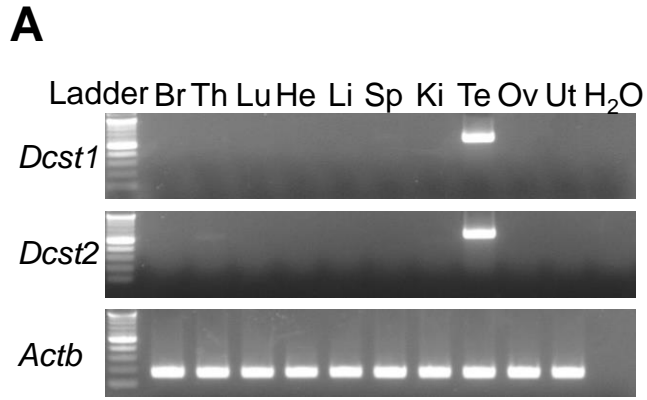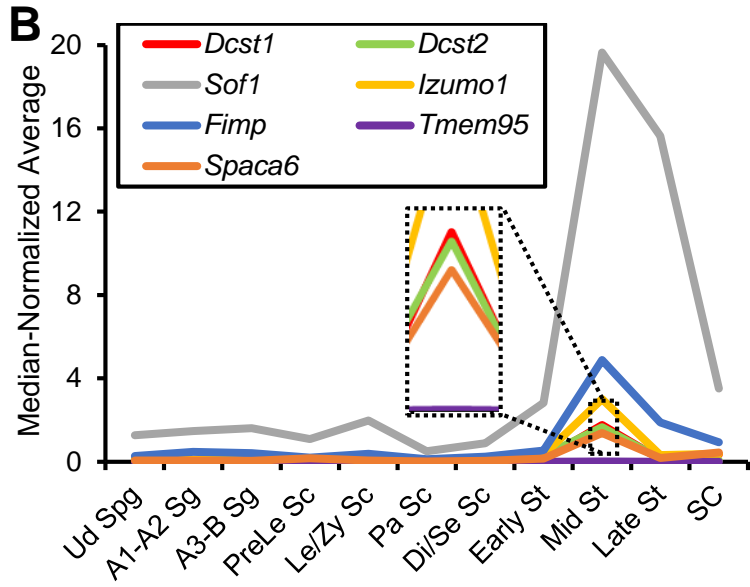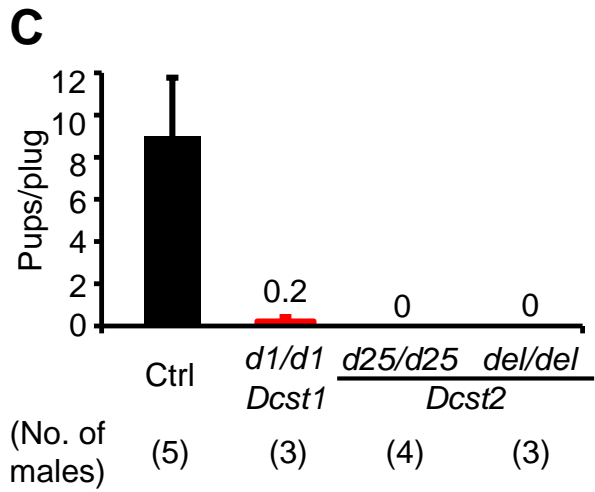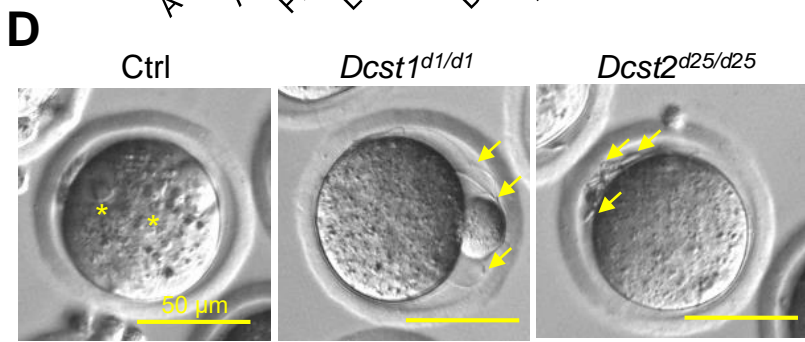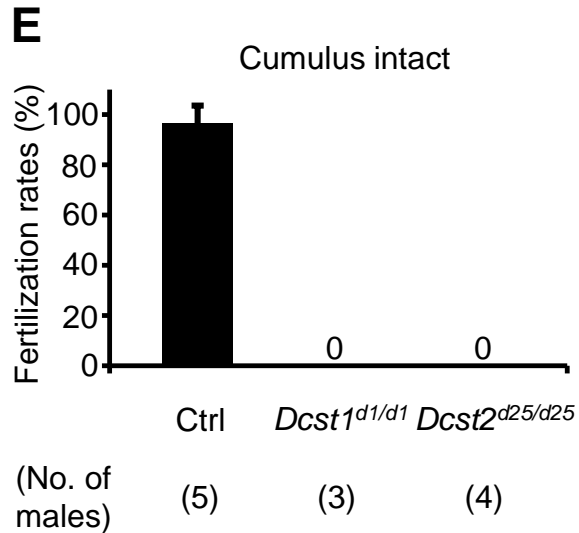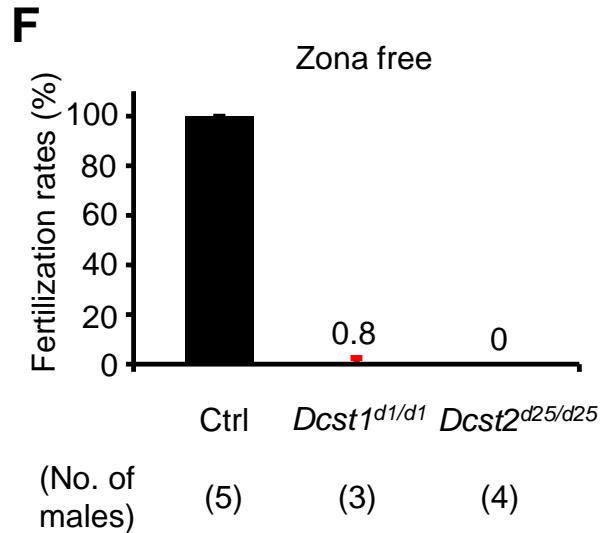

## Figure 2

**A**

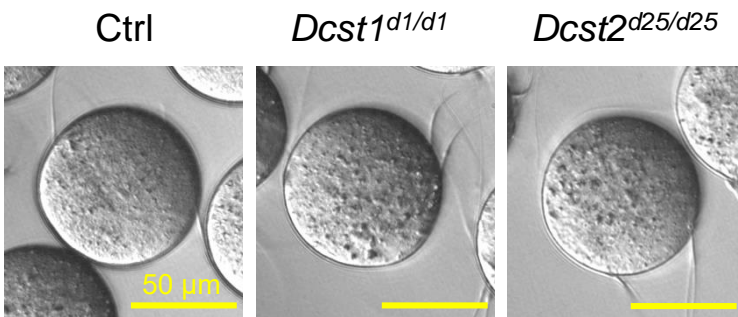

**B**

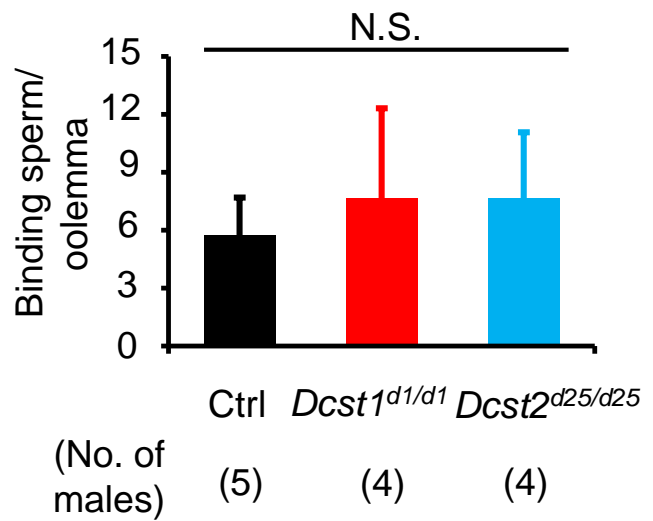

**C**

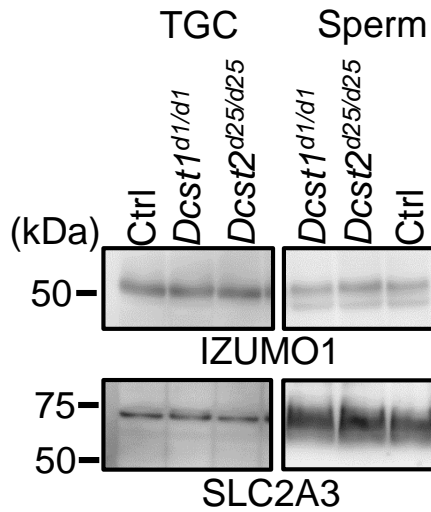

**E**

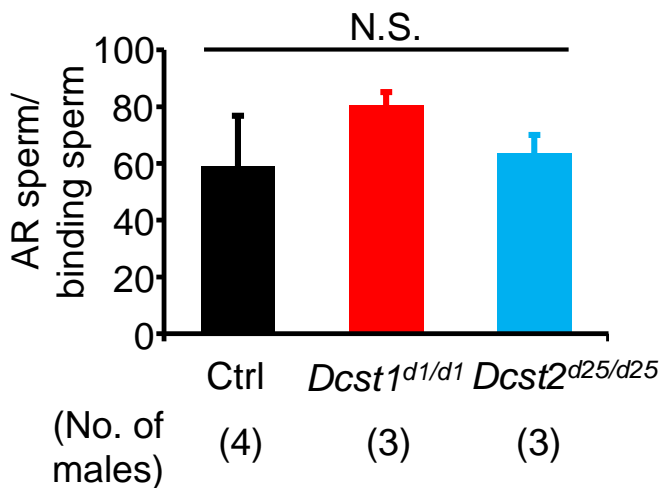

**D**

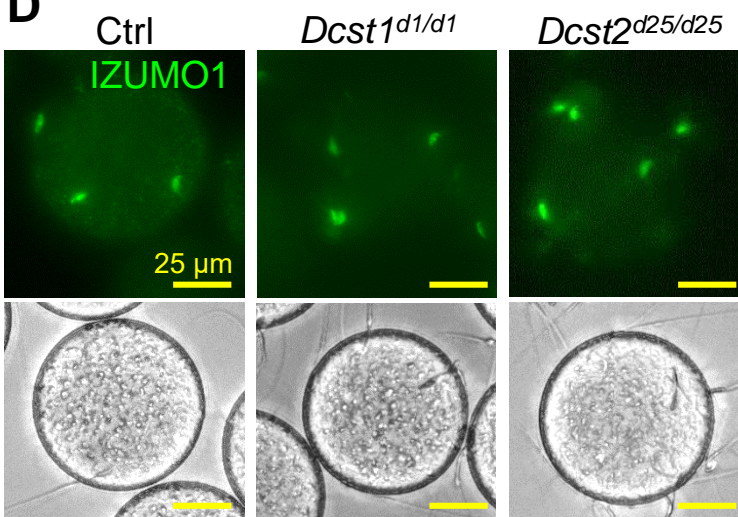

**G**

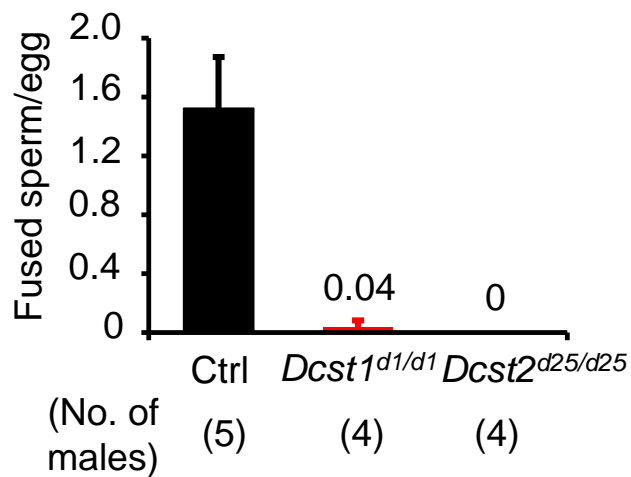

**F**

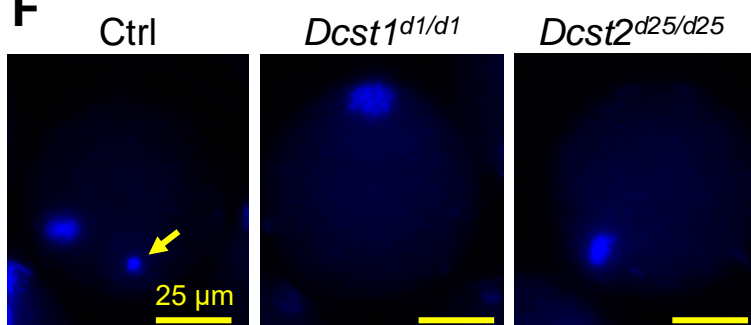

## Figure 3

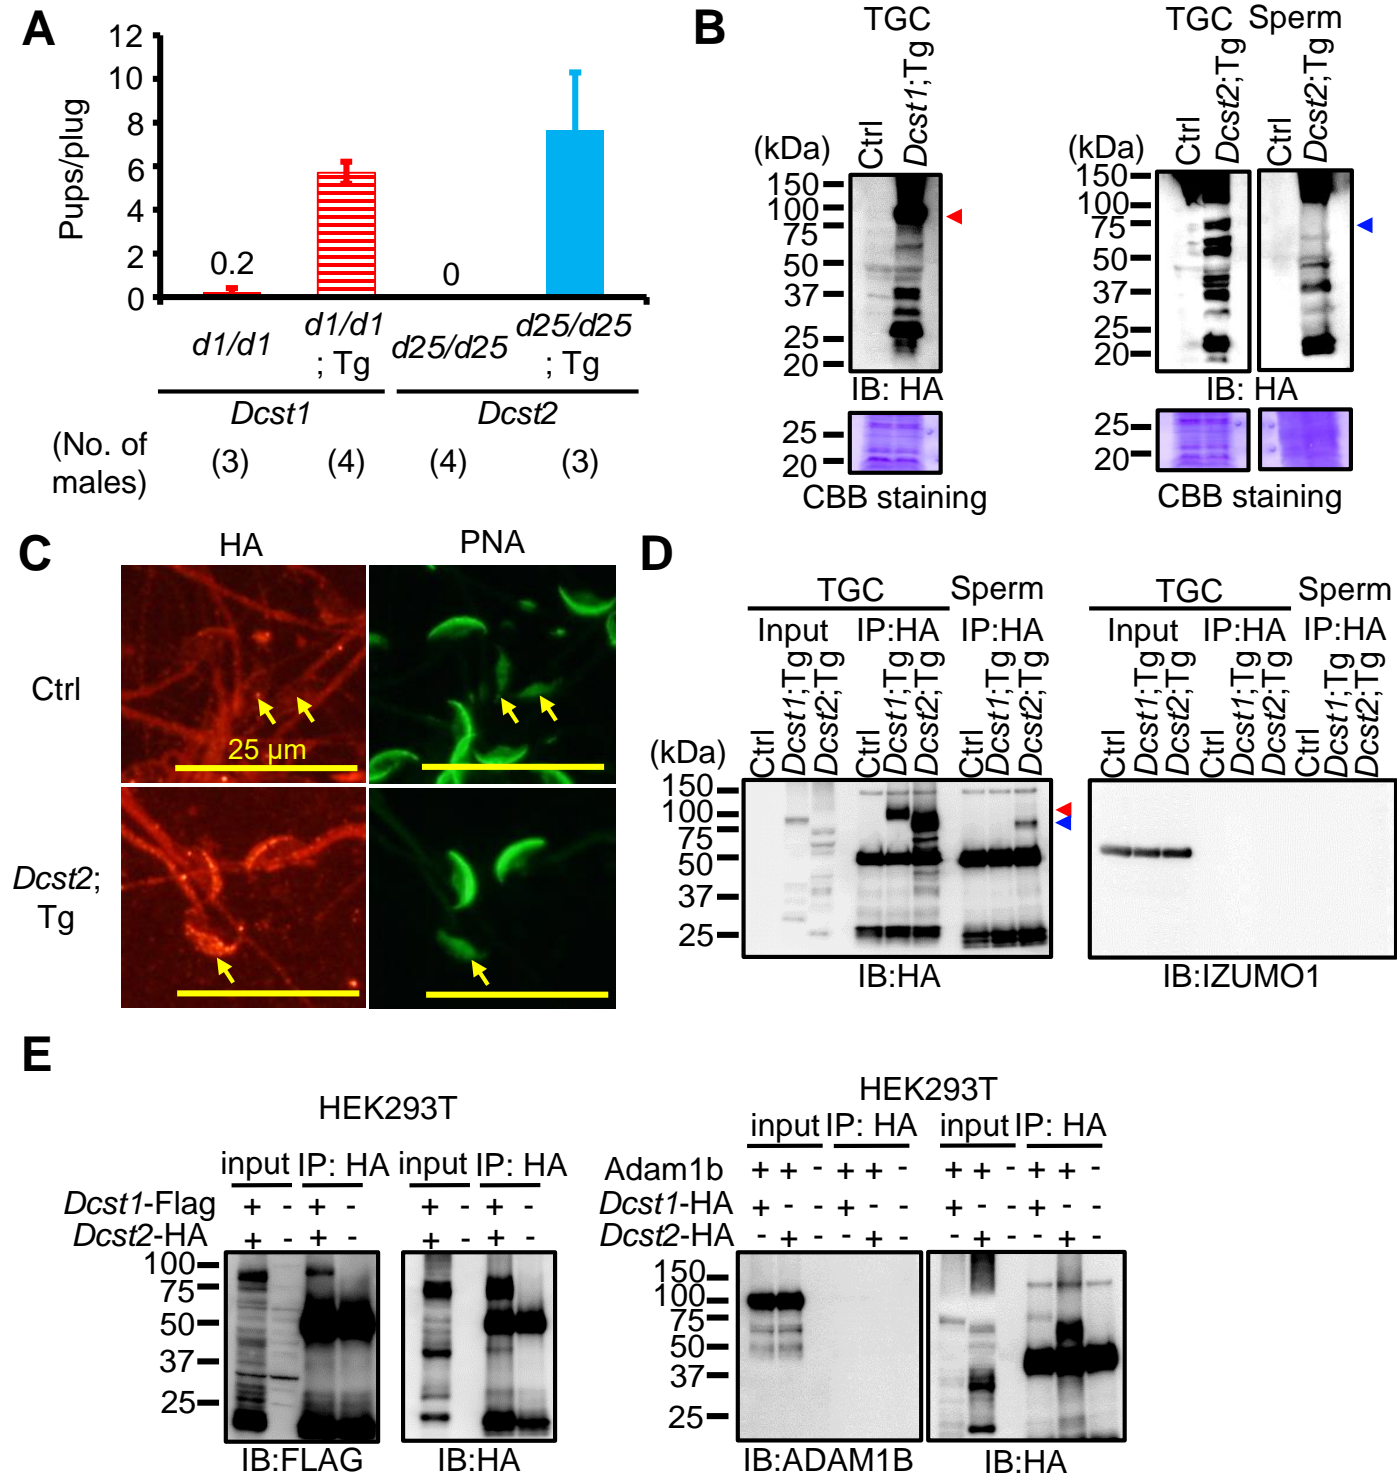

## Figure 4

**A**

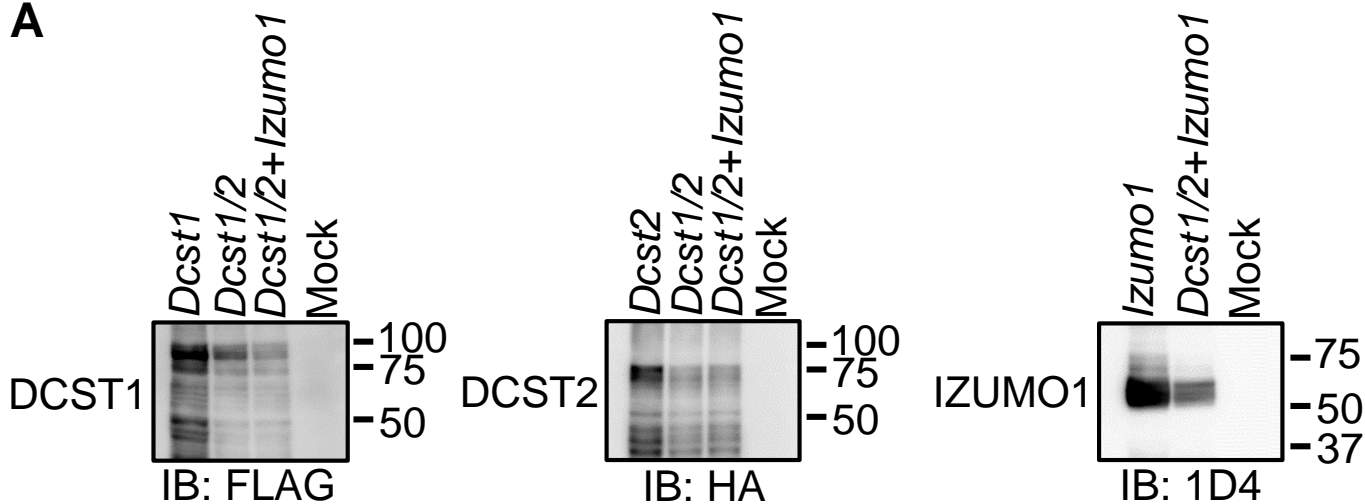

**B**

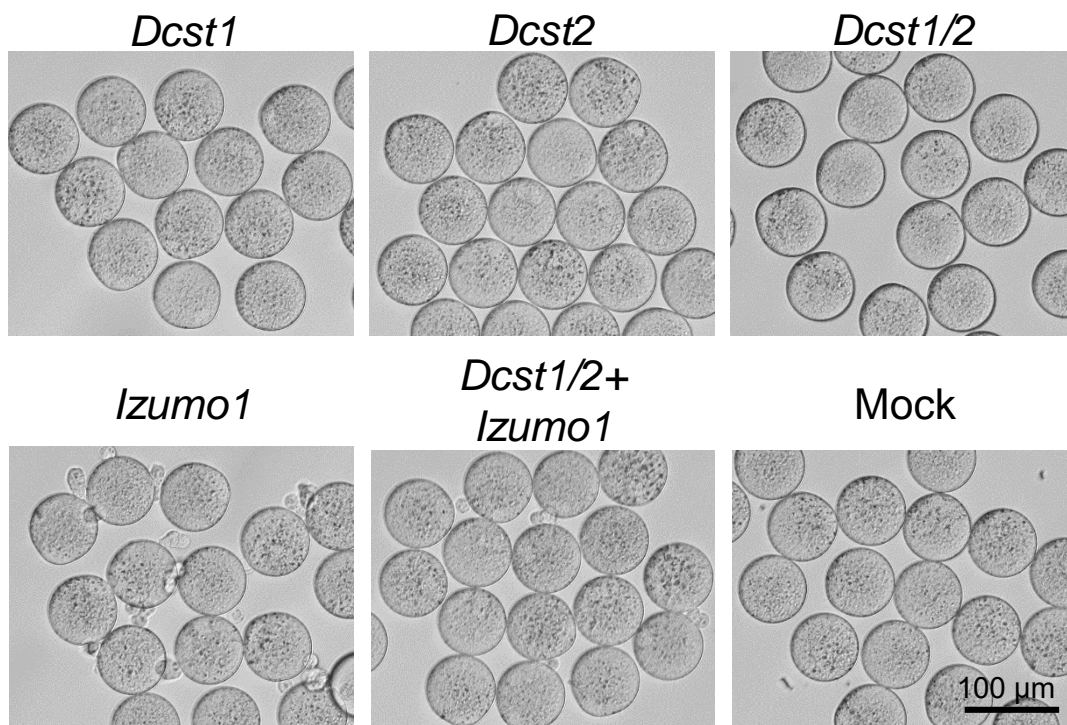

**C**

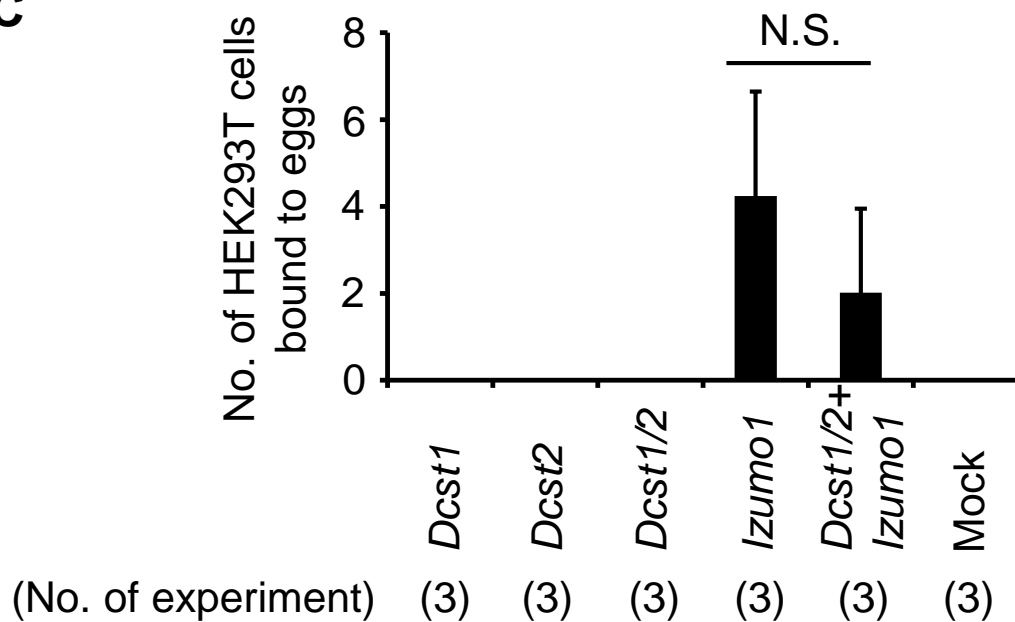

# Figure 5

**A**

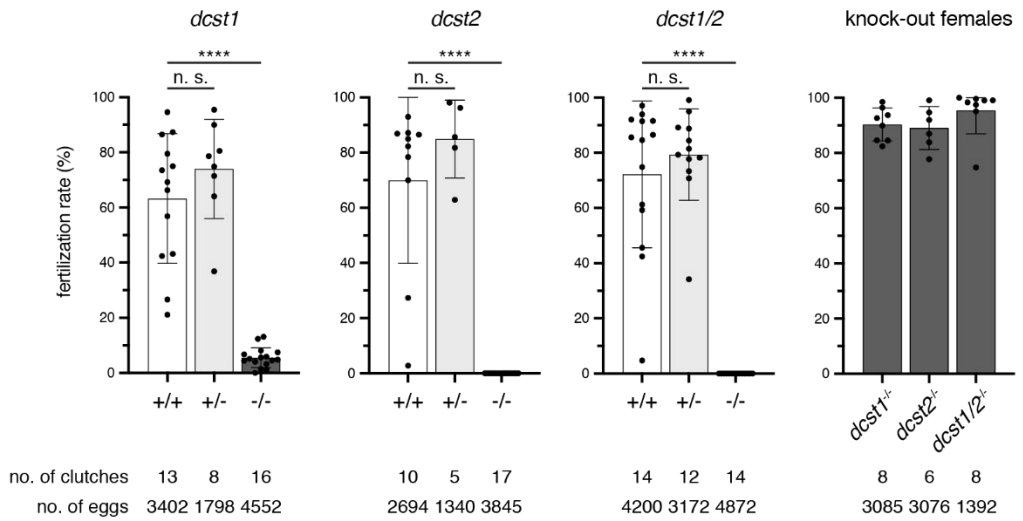

**B**

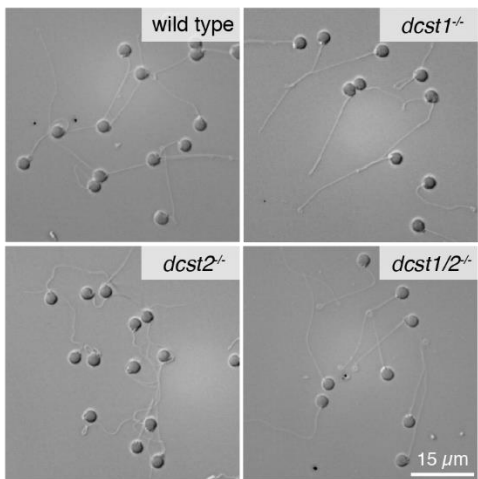

**C**

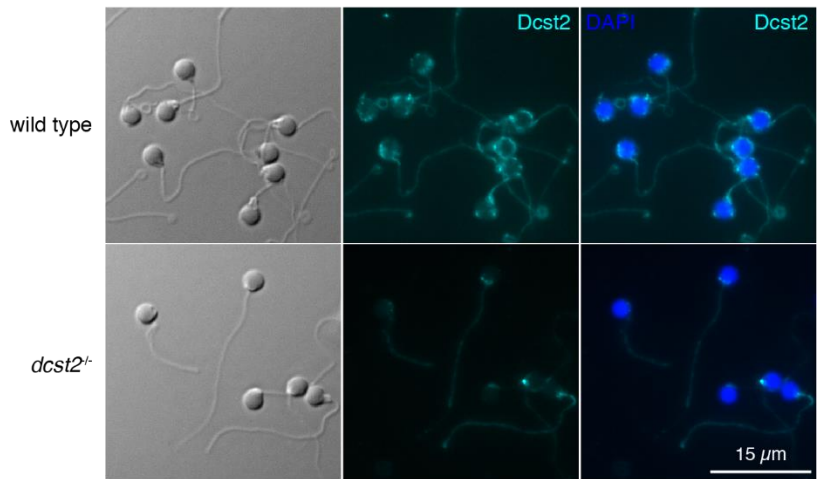

**D**

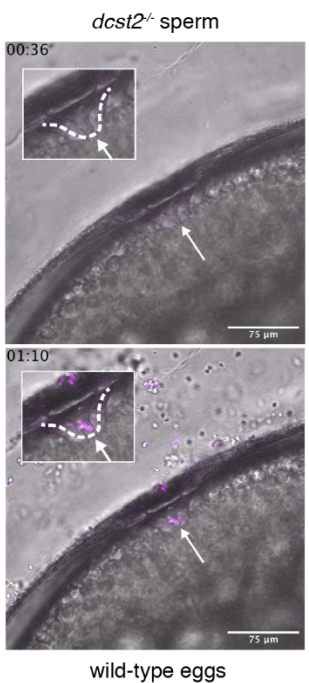

**E**

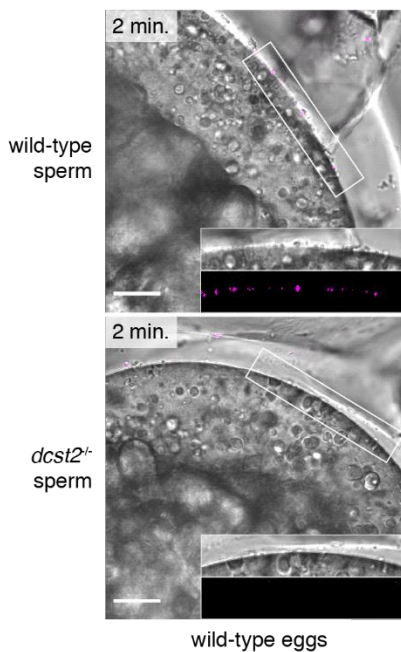

**F**

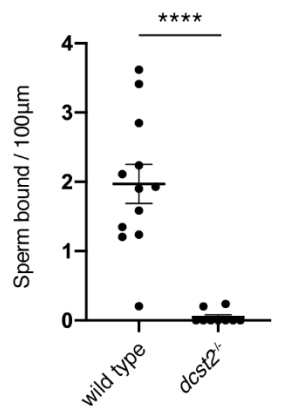

Source: http://biorxiv.org/content/10.1101/2021.04.18.440256v1.full.pdf
